# Supplementary material
Source: PubMed Central journal article supplement (PMC8106702)
Supplement: JCM.02078-20-s0001.pdf [file JCM.02078-20-s0001.pdf]

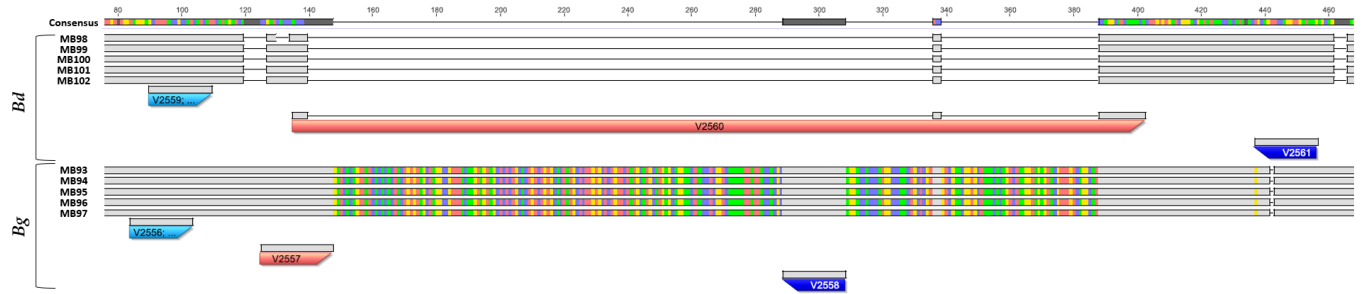

Supplementary Figure 1. **Multiple alignment of *BAD1* gene of *B. dermatitidis* and *B. gilchristii*.** The sequences of *BAD1* gene from *B. dermatitidis* (*Bd*) and *B. gilchristii* (*Bg*) were aligned using MUSCLE alignment program in Geneious. The gray area shows the consensus sequences between *Bd* and *Bg* while the color area shows the non-consensus sequences, and the line indicates deletion of nucleotide sequences. The *Bd* probe V2560 is stretched because the alignment with *Bg* sequences had insertions at the assigned region.

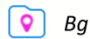

Bg

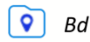

Bd

1. Western New York
2. Finger Lakes
3. Southern Tier
4. Central New York
5. North Country
6. Mohawk Valley
7. Capital District
8. Hudson Valley
9. New York City
10. Long Island

Map made using Mapline  
(<https://mapline.com/>)

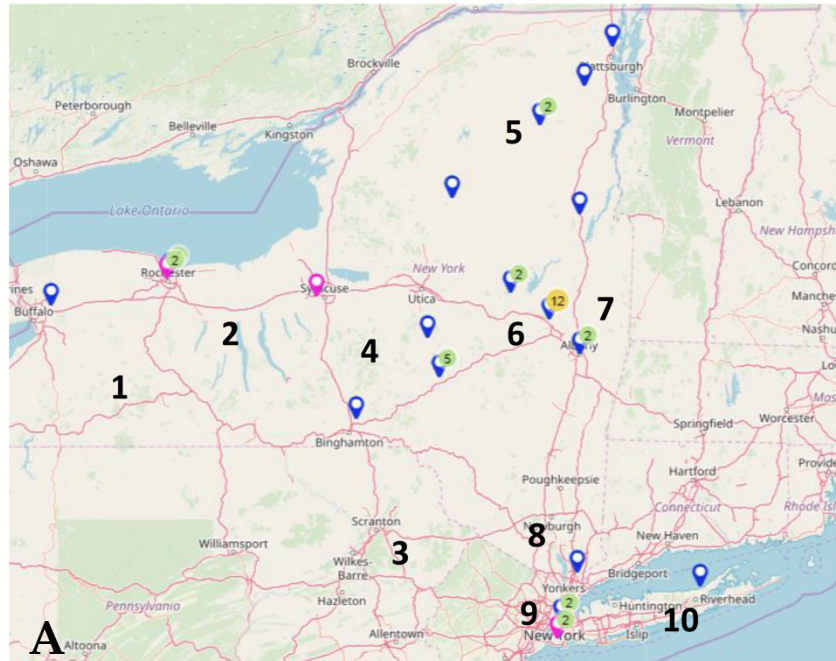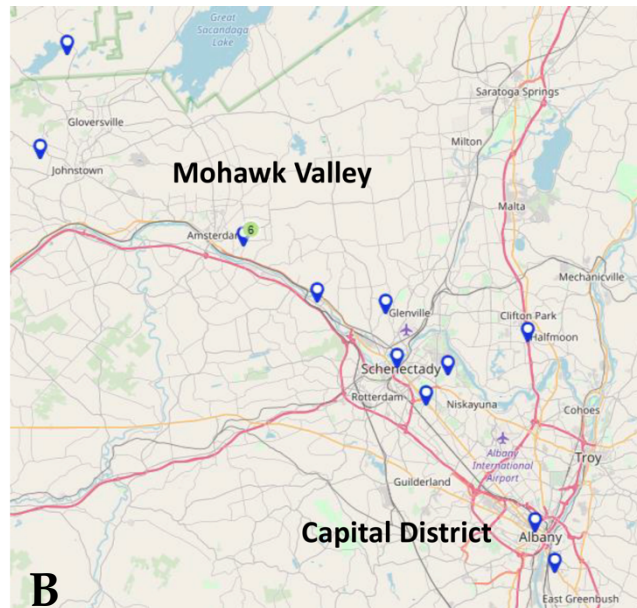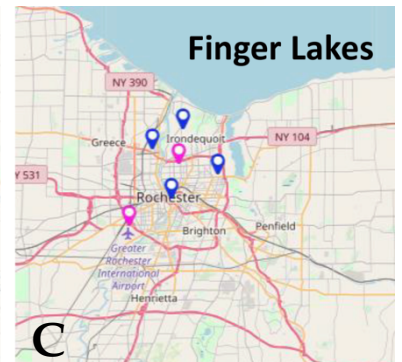

Supplementary Figure 2. **Geographic distribution of blastomycosis cases in New York from 2005 to 2019.** (A) Patient's residence (Zip Code) was utilized to map cases of blastomycosis due to *B. dermatitidis* (*Bd*) and *B. gilchristii* (*Bg*) in New York. (B) Clustering of cases in Mohawk Valley and Capital District, and (C) Finger Lakes, are shown.

Supplementary Table 1. Details of duplex real-time PCR assay of Blastomycosis cases from New York (2005-2019)

| Case No. | Primary Sample Collection Date | Source <i>Blastomyces</i> recovered in culture | DNA Concentration (ng/ $\mu$ L) | Single plex real-time PCR ( <i>Blastomyces</i> spp.) Ct (FAM) | Duplex real-time PCR    |                         | Final ID               |
|----------|--------------------------------|------------------------------------------------|---------------------------------|---------------------------------------------------------------|-------------------------|-------------------------|------------------------|
|          |                                |                                                |                                 |                                                               | <i>Bd</i> Mean Ct (Cy5) | <i>Bg</i> Mean Ct (FAM) |                        |
| Case 1   | 7/14/2005                      | Bone                                           | 6.48                            | 22                                                            | 22.03                   | Undet                   | <i>B. dermatitidis</i> |
| Case 2   | 2/23/2006                      | BAL                                            | 4.98                            | 20.7                                                          | 20.71                   | Undet                   | <i>B. dermatitidis</i> |
| Case 3   | 8/10/2006                      | Tissue                                         | 3.92                            | 20.7                                                          | 22.57                   | Undet                   | <i>B. dermatitidis</i> |
| Case 4   | 1/17/2008                      | Tissue                                         | 5.08                            | 22.5                                                          | 22.57                   | Undet                   | <i>B. dermatitidis</i> |
| Case 4   | 1/17/2008                      | Tissue                                         | 9.98                            | 21.5                                                          | 20.51                   | Undet                   | <i>B. dermatitidis</i> |
| Case 4   | 1/17/2008                      | Tissue                                         | 7.22                            | 21.2                                                          | 20.46                   | Undet                   | <i>B. dermatitidis</i> |
| Case 5   | 4/23/2008                      | BAL                                            | 7.32                            | 20.19                                                         | Undet                   | 20.67                   | <i>B. gilchristii</i>  |
| Case 6   | 8/17/2009                      | Tissue                                         | 6.02                            | 22.01                                                         | 21.31                   | Undet                   | <i>B. dermatitidis</i> |
| Case 7   | 11/18/2009                     | Tissue                                         | 1.61                            | Culture**                                                     | 24.17                   | Undet                   | <i>B. dermatitidis</i> |
| Case 8   | 2/10/2010                      | LUNG                                           | 2.58                            | 22.29                                                         | Undet                   | 22.75                   | <i>B. gilchristii</i>  |
| Case 9   | 3/1/2012                       | BAL                                            | 31.8                            | 23.33                                                         | 22.43                   | Undet                   | <i>B. dermatitidis</i> |
| Case 10  | 9/26/2012                      | Lung                                           | 47                              | 20.97                                                         | 19.47                   | Undet                   | <i>B. dermatitidis</i> |
| Case 11  | 6/6/2013                       | Aspirate                                       | 23.8                            | 20.94                                                         | 18.57                   | Undet                   | <i>B. dermatitidis</i> |
| Case 12  | 10/25/2013                     | Bone                                           | 3.92                            | 18.8                                                          | 23.58                   | Undet                   | <i>B. dermatitidis</i> |
| Case 13  | 11/19/2013                     | BAL                                            | 5.56                            | 20.54                                                         | 22.12                   | Undet                   | <i>B. dermatitidis</i> |
| Case 14  | 2/11/2014                      | Skin lesion fluid*                             | 21.2                            | 28.25                                                         | 20.23                   | Undet                   | <i>B. dermatitidis</i> |
| Case 15  | 2/17/2014                      | Sputum                                         | 9.74                            | 20.52                                                         | 22.47                   | Undet                   | <i>B. dermatitidis</i> |
| Case 15  | 2/18/2014                      | BAL                                            | 0.676                           | 24.34                                                         | 21.46                   | Undet                   | <i>B. dermatitidis</i> |
| Case 16  | 5/29/2014                      | BAL                                            | 33                              | 27.63                                                         | 20.73                   | Undet                   | <i>B. dermatitidis</i> |
| Case 16  | 6/12/2014                      | BAL                                            | 41.8                            | 21.73                                                         | 18.99                   | Undet                   | <i>B. dermatitidis</i> |
| Case 17  | 8/8/2014                       | Brain                                          | 0.766                           | 28.99                                                         | 27.95                   | Undet                   | <i>B. dermatitidis</i> |
| Case 18  | 9/29/2015                      | Cyst                                           | 1.21                            | 26.94                                                         | 24.04                   | Undet                   | <i>B. dermatitidis</i> |
| Case 19  | 10/20/2016                     | Hand                                           | 3.7                             | 27.7                                                          | 20.68                   | Undet                   | <i>B. dermatitidis</i> |
| Case 20  | 1/13/2017                      | Lung                                           | 27                              | 24.36                                                         | 20.14                   | Undet                   | <i>B. dermatitidis</i> |
| Case 21  | 1/16/2017                      | BAL                                            | 47.2                            | 26.33                                                         | Undet                   | 19.26                   | <i>B. gilchristii</i>  |
| Case 22  | 3/1/2017                       | Lung                                           | 7.36                            | 26.79                                                         | 23.74                   | Undet                   | <i>B. dermatitidis</i> |
| Case 23  | 5/2/2017                       | Sputum                                         | 12.1                            | 21.73                                                         | 21.07                   | Undet                   | <i>B. dermatitidis</i> |
| Case 24  | 5/17/2017                      | BAL                                            | 22                              | 22.01                                                         | 20.37                   | Undet                   | <i>B. dermatitidis</i> |
| Case 25  | 6/28/2017                      | Tissue                                         | 2.76                            | 23.22                                                         | 23.06                   | Undet                   | <i>B. dermatitidis</i> |
| Case 26  | 10/26/2017                     | BAL                                            | 2.5                             | 21.19                                                         | 23.49                   | Undet                   | <i>B. dermatitidis</i> |
| Case 26  | 10/26/2017                     | BAL                                            | 0.866                           | 21.34                                                         | 24.37                   | Undet                   | <i>B. dermatitidis</i> |
| Case 26  | 10/27/2017                     | Sputum                                         | 5.38                            | 32.47                                                         | 36.56                   | Undet                   | <i>B. dermatitidis</i> |
| Case 26  | 10/27/2017                     | Sputum                                         | 40.8                            | 29.71                                                         | 32.02                   | Undet                   | <i>B. dermatitidis</i> |
| Case 26  | 10/27/2017                     | Sputum                                         | 26                              | 26.8                                                          | 29.58                   | Undet                   | <i>B. dermatitidis</i> |
| Case 27  | 10/3/2018                      | Bone - Left Tibia                              | 4.48                            | 19.11                                                         | 21.54                   | Undet                   | <i>B. dermatitidis</i> |
| Case 28  | 2/13/2018                      | Bone (Tibia)                                   | 1.37                            | 20.05                                                         | 22.71                   | Undet                   | <i>B. dermatitidis</i> |
| Case 29  | 3/6/2018                       | Tissue block - Left nasal Mass*                | 1.46                            | 37.4                                                          | 39.63                   | Undet                   | <i>B. dermatitidis</i> |

|         |            |                                 |       |       |       |       |                        |
|---------|------------|---------------------------------|-------|-------|-------|-------|------------------------|
| Case 29 | 3/6/2018   | Tissue block - Left nasal Mass* | 2.3   | 33.29 | 37.24 | Undet | <i>B. dermatitidis</i> |
| Case 30 | 2/28/2018  | Tissue - Left Thigh             | 0.298 | 20.47 | 23.58 | Undet | <i>B. dermatitidis</i> |
| Case 31 | 8/5/2018   | BAL                             | 0.658 | 22.63 | 27.74 | Undet | <i>B. dermatitidis</i> |
| Case 32 | 7/2/2018   | BAL                             | 15    | 22.89 | 27.36 | Undet | <i>B. dermatitidis</i> |
| Case 33 | 9/27/2018  | Tissue block*                   | 1.71  | 36.02 | 40.29 | Undet | <i>B. dermatitidis</i> |
| Case 34 | 10/2/2018  | Bone (Femur)                    | 9.86  | 19.09 | 22.77 | Undet | <i>B. dermatitidis</i> |
| Case 35 | 12/17/2018 | BAL                             | 1.72  | 19.72 | Undet | 22.49 | <i>B. gilchristii</i>  |
| Case 36 | 1/20/2019  | Tissue                          | 0.434 | 20.87 | 24.81 | Undet | <i>B. dermatitidis</i> |
| Case 37 | 4/25/2019  | BAL                             | 0.48  | 21.01 | 24.54 | Undet | <i>B. dermatitidis</i> |
| Case 38 | 5/5/2019   | BAL*                            | 5.6   | 23.54 | 27.13 | Undet | <i>B. dermatitidis</i> |
| Case 39 | 5/9/2019   | BAL                             | 0.336 | 23.8  | 24.52 | Undet | <i>B. dermatitidis</i> |
| Case 40 | 5/23/2019  | Wound fluid                     | 1.64  | 20.16 | 23.26 | Undet | <i>B. dermatitidis</i> |
| Case 41 | 7/2/2019   | BAL                             | 11.5  | 18.74 | 23.06 | Undet | <i>B. dermatitidis</i> |
| Case 42 | 7/19/2019  | BAL                             | 23.5  | 19.45 | 24.28 | Undet | <i>B. dermatitidis</i> |
| Case 43 | 10/22/2019 | BAL                             | 10.4  | 18.88 | Undet | 17.73 | <i>B. gilchristii</i>  |
| Case 43 | 10/22/2019 | BAL                             | 13.6  | 18.74 | Undet | 17.73 | <i>B. gilchristii</i>  |

\*Primary samples; \*\* Culture was confirmed by converting to the yeast form

Supplementary Table 2. Specificity study of duplex real-time PCR assay

| Fungal ID                                | Source               | Isolate DNA (ng/ $\mu$ L) | Duplex rt-PCR Result |
|------------------------------------------|----------------------|---------------------------|----------------------|
| <b><u>MOLDS</u></b>                      |                      |                           |                      |
| <i>Alternaria alternata</i>              | Nasal cavity         | 108.3                     | Negative             |
| <i>Aspergillus flavus</i>                | Sputum               | 60.3                      | Negative             |
| <i>A. fumigatus</i>                      | Sputum               | 18.5                      | Negative             |
| <i>A. nidulans</i>                       | BAL                  | 54.2                      | Negative             |
| <i>A. niger</i>                          | Nasal cavity         | 147.1                     | Negative             |
| <i>A. versicolor</i>                     | Lung                 | 123.4                     | Negative             |
| <i>Blastobotrys adeninivorans</i>        | CSF                  | 255.8                     | Negative             |
| <i>Blastomyces persicus</i> (ATCC 56214) | Human (Mozambique)   | 101.5                     | Negative             |
| <i>B. emzantsi</i> (ATCC 56216)          | Human (South Africa) | 159.2                     | Negative             |
| <i>Cladosporium halotolerans</i>         | Nail                 | 92.8                      | Negative             |
| <i>C. ramotenellum</i>                   | Sputum               | 2.2                       | Negative             |
| <i>Chaetomium globosum</i>               | Nail                 | 90.1                      | Negative             |
| <i>Chrysosporium queenslandicum</i>      | BAL                  | 21.2                      | Negative             |
| <i>C. queenslandicum</i>                 | No source            | 50.1                      | Negative             |
| <i>Coccidioides immitis</i>              | BAL                  | 6.9                       | Negative             |
| <i>C. posadasii</i>                      | BAL                  | 18.2                      | Negative             |
| <i>C. posadasii</i>                      | Sputum               | 120                       | Negative             |
| <i>Epidermophyton floccosum</i>          | Nail                 | 34                        | Negative             |
| <i>Exophiala dermatitidis</i>            | BAL                  | 110.8                     | Negative             |

|                                    |                       |       |          |
|------------------------------------|-----------------------|-------|----------|
| <i>E. lecanii-corni</i>            | Nail                  | 102.4 | Negative |
| <i>Fusarium oxysporum</i>          | Nail                  | 152.4 | Negative |
| <i>Geomyces pannorum</i>           | BAL                   | 280.4 | Negative |
| <i>Glomerella lagenaria</i>        | BAL                   | 3.6   | Negative |
| <i>Histoplasma capsulatum</i>      | Blood                 | 110.7 | Negative |
| <i>H. capsulatum</i>               | Lung                  | 17.7  | Negative |
| <i>Hyphopichia burtonii</i>        | Mouth                 | 302.5 | Negative |
| <i>Lichtheimia corymbifera</i>     | BAL                   | 10.5  | Negative |
| <i>Malbranchea circinata</i>       | Nail                  | 19.8  | Negative |
| <i>Microsporium gypseum</i>        | Nail                  | 318.7 | Negative |
| <i>M. canis</i>                    | Scalp                 | 117.4 | Negative |
| <i>Phoma herbarum</i>              | Nail                  | 91.2  | Negative |
| <i>Phlebia fuscoatra</i>           | Sputum                | 28.9  | Negative |
| <i>Rhizopus oryzae</i>             | Urine                 | 116.4 | Negative |
| <i>Scedosporium boydii</i>         | Nail                  | 53.3  | Negative |
| <i>Sporothrix schenckii</i>        | Finger                | 72.8  | Negative |
| <i>Trametes versicolor</i>         | BAL                   | 43.2  | Negative |
| <i>T. versicolor</i>               | Eye                   | 17.8  | Negative |
| <i>Trichosporon asahii</i>         | Urine                 | 132.4 | Negative |
| <i>Trichophyton mentagrophytes</i> | Nail                  | 62.6  | Negative |
| <i>T. rubrum</i>                   | Nail                  | 9.3   | Negative |
| <i>T. violaceum</i>                | Scalp                 | 33.9  | Negative |
| <b>YEASTS</b>                      |                       |       |          |
| <i>Candida albicans</i>            | BAL                   | 252.4 | Negative |
| <i>C. auris</i>                    | Blood                 | 180.8 | Negative |
| <i>C. auris</i>                    | Blood                 | 108.6 | Negative |
| <i>C. auris</i>                    | Blood                 | 173.8 | Negative |
| <i>C. duobushaemulonii</i>         | Nail                  | 112.6 | Negative |
| <i>C. glabrata</i>                 | Blood                 | 127   | Negative |
| <i>C. haemulonii</i>               | Tissue                | 55.7  | Negative |
| <i>C. haemulonii</i>               | Bone                  | 149   | Negative |
| <i>C. krusei</i>                   | Blood                 | 3     | Negative |
| <i>C. lusitaniae</i>               | Blood                 | 95.8  | Negative |
| <i>C. orthopsilosis</i>            | Abdominal fluid       | 52.6  | Negative |
| <i>C. parapsilosis</i>             | Blood                 | 78.5  | Negative |
| <i>C. tropicalis</i>               | Sputum                | 101.5 | Negative |
| <i>Cryptococcus albidus</i>        | Nail                  | 7.9   | Negative |
| <i>C. diffluens</i>                | No source             | 6.2   | Negative |
| <i>C. gattii</i> (VG1)             | CSF                   | 54.7  | Negative |
| <i>C. liquefaciens</i>             | Right Posterior Ankle | 82.7  | Negative |
| <i>Debaryomyces hansenii</i>       | Foot                  | 48    | Negative |
| <i>Pichia norvegensis</i>          | No source             | 194.8 | Negative |
| <i>Saccharomyces cerevisiae</i>    | Vaginal swab          | 100.8 | Negative |
| Pos Ctrl Bg (MB97)                 | N/A                   | 10.0  | Positive |
| Pos Ctrl Bd (M808)                 | N/A                   | 15.5  | Positive |

Supplementary Table 3 A. Inter-assay reproducibility of duplex real-time PCR assay

| <i>Blastomyces</i> spp. | Strain No. | <i>B. dermatitidis</i> (Cy5) |      |      |         | <i>B. gilchristii</i> (FAM) |      |      |         | ±SD | %CV |
|-------------------------|------------|------------------------------|------|------|---------|-----------------------------|------|------|---------|-----|-----|
|                         |            | Ct 1                         | Ct 2 | Ct 3 | Mean Ct | Ct 1                        | Ct 2 | Ct 3 | Mean Ct |     |     |

|                        |       |       |       |       |       |       |       |       |       |      |      |
|------------------------|-------|-------|-------|-------|-------|-------|-------|-------|-------|------|------|
| <i>B. gilchristii</i>  | MB95  | Undet | Undet | Undet | N/A   | 22.9  | 22.47 | 21.35 | 22.24 | 0.8  | 3.59 |
|                        | MB96  | Undet | Undet | Undet | N/A   | 24.21 | 23.68 | 23.2  | 23.7  | 0.51 | 2.15 |
|                        | MB97  | Undet | Undet | Undet | N/A   | 23.78 | 23.24 | 22.37 | 23.13 | 0.71 | 3.07 |
| <i>B. dermatitidis</i> | MB98  | 24.88 | 25.63 | 25.09 | 25.2  | Undet | Undet | Undet | N/A   | 0.39 | 1.55 |
|                        | MB99  | 24.18 | 24.97 | 24.24 | 24.46 | Undet | Undet | Undet | N/A   | 0.44 | 1.8  |
|                        | MB100 | 22.68 | 23.42 | 22.49 | 22.86 | Undet | Undet | Undet | N/A   | 0.49 | 2.14 |

Supplementary Table 3 B. Intra-assay reproducibility of duplex real-time PCR assay

| <i>Blastomyces</i><br><b>spp</b> | <b>Strain No.</b> | <i>B. dermatitidis</i> (Cy5) |       |       |         | <i>B. gilchristii</i> (FAM) |       |       |         | ±SD    | %CV    |
|----------------------------------|-------------------|------------------------------|-------|-------|---------|-----------------------------|-------|-------|---------|--------|--------|
|                                  |                   | Ct 1                         | Ct 2  | Ct 3  | Mean Ct | Ct 1                        | Ct 2  | Ct 3  | Mean Ct |        |        |
| <i>B. gilchristii</i>            | MB95              | Undet                        | Undet | Undet | N/A     | 22.99                       | 22.85 | 22.88 | 22.91   | 0.0737 | 0.322  |
|                                  | MB96              | Undet                        | Undet | Undet | N/A     | 24.24                       | 24.15 | 24.23 | 24.21   | 0.0493 | 0.204  |
|                                  | MB97              | Undet                        | Undet | Undet | N/A     | 23.77                       | 23.79 | 23.78 | 23.78   | 0.01   | 0.0421 |
| <i>B. dermatitidis</i>           | MB98              | 24.91                        | 24.87 | 24.87 | 24.88   | Undet                       | Undet | Undet | N/A     | 0.0231 | 0.0928 |
|                                  | MB99              | 24.03                        | 24.15 | 24.36 | 24.18   | Undet                       | Undet | Undet | N/A     | 0.167  | 0.691  |
|                                  | MB100             | 22.81                        | 22.69 | 22.55 | 22.68   | Undet                       | Undet | Undet | N/A     | 0.13   | 0.573  |
